# Supplementary material for: Structural Analysis of Mitochondrial Mutations Reveals a Role for Bigenomic Protein Interactions in Human Disease
Source: PubMed Central journal article supplement (PMC3706435; doi:10.1371/journal.pone.0069003), 2013-07-09
Supplement: pone.0069003.s001.pdf [file pone.0069003.s001.pdf]

Figure S1. Sequence alignment of human vs bovine complexes.

### Complex III

#### MT-CYB

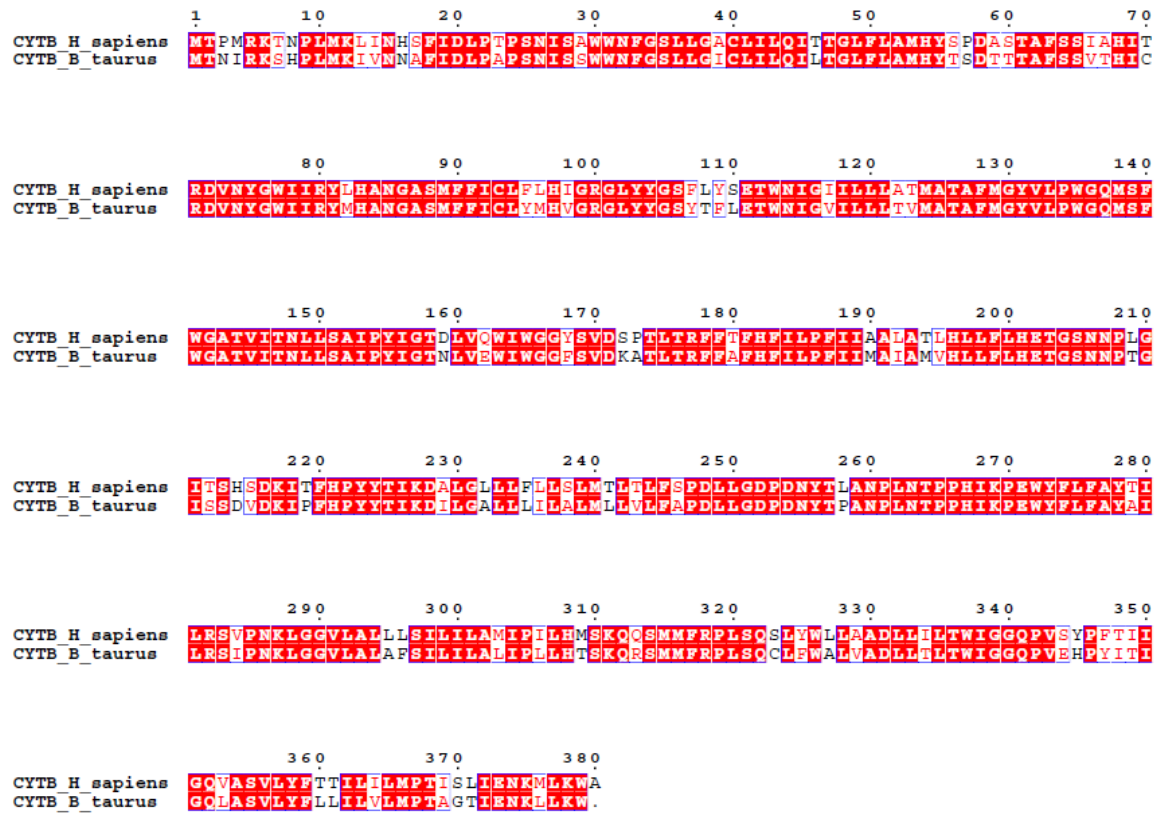

## Complex IV

### a) MT-CO1

|                |   |    |    |    |    |    |    |    |   |   |   |   |   |   |   |   |   |   |   |   |   |   |   |   |   |   |   |   |   |   |   |   |   |   |   |   |   |   |   |   |   |   |   |   |   |   |   |   |   |   |   |   |   |   |   |   |   |   |   |   |   |   |   |   |   |   |
|----------------|---|----|----|----|----|----|----|----|---|---|---|---|---|---|---|---|---|---|---|---|---|---|---|---|---|---|---|---|---|---|---|---|---|---|---|---|---|---|---|---|---|---|---|---|---|---|---|---|---|---|---|---|---|---|---|---|---|---|---|---|---|---|---|---|---|---|
|                | 1 | 10 | 20 | 30 | 40 | 50 | 60 | 70 |   |   |   |   |   |   |   |   |   |   |   |   |   |   |   |   |   |   |   |   |   |   |   |   |   |   |   |   |   |   |   |   |   |   |   |   |   |   |   |   |   |   |   |   |   |   |   |   |   |   |   |   |   |   |   |   |   |   |
| COX1_H_sapiens | M | P  | D  | R  | W  | L  | F  | S  | T | N | H | K | D | I | G | T | L | L | F | G | A | W | A | G | V | L | G | T | A | L | S | L | L | I | R | A | E | L | G | Q | P | C | N | L | L | G | N | D | H | I | Y | N | V | V | T | A | H | A | F | V | M | I | F | P | N | V |
| COX1_B_taurus  | M | P  | D  | R  | W  | L  | F  | S  | T | N | H | K | D | I | G | T | L | L | F | G | A | W | A | G | V | L | G | T | A | L | S | L | L | I | R | A | E | L | G | Q | P | C | N | L | L | G | N | D | H | I | Y | N | V | V | T | A | H | A | F | V | M | I | F | P | N | V |

  

|                |    |    |     |     |     |     |     |   |   |   |   |   |   |   |   |   |   |   |   |   |   |   |   |   |   |   |   |   |   |   |   |   |   |   |   |   |   |   |   |   |   |   |   |   |   |   |   |   |   |   |   |   |   |   |   |   |   |   |   |   |   |   |   |   |   |   |   |   |   |
|----------------|----|----|-----|-----|-----|-----|-----|---|---|---|---|---|---|---|---|---|---|---|---|---|---|---|---|---|---|---|---|---|---|---|---|---|---|---|---|---|---|---|---|---|---|---|---|---|---|---|---|---|---|---|---|---|---|---|---|---|---|---|---|---|---|---|---|---|---|---|---|---|---|
|                | 80 | 90 | 100 | 110 | 120 | 130 | 140 |   |   |   |   |   |   |   |   |   |   |   |   |   |   |   |   |   |   |   |   |   |   |   |   |   |   |   |   |   |   |   |   |   |   |   |   |   |   |   |   |   |   |   |   |   |   |   |   |   |   |   |   |   |   |   |   |   |   |   |   |   |   |
| COX1_H_sapiens | M  | P  | I   | M   | I   | G   | G   | F | G | N | L | V | L | P | L | M | I | G | A | P | D | M | A | F | P | R | M | N | N | M | S | F | W | L | L | P | P | S | L | L | L | L | A | S | A | M | V | E | A | G | A | G | T | G | W | T | V | Y | P | P | L | A | C | N | Y | S | H | P | G |
| COX1_B_taurus  | M  | P  | I   | M   | I   | G   | G   | F | G | N | L | V | L | P | L | M | I | G | A | P | D | M | A | F | P | R | M | N | N | M | S | F | W | L | L | P | P | S | L | L | L | L | A | S | S | M | V | E | A | G | A | G | T | G | W | T | V | Y | P | P | L | A | C | N | L | A | H | A | G |

  

|                |     |     |     |     |     |     |     |   |   |   |   |   |   |   |   |   |   |   |   |   |   |   |   |   |   |   |   |   |   |   |   |   |   |   |   |   |   |   |   |   |   |   |   |   |   |   |   |   |   |   |   |   |   |   |   |   |   |   |   |   |   |   |   |   |   |   |   |   |
|----------------|-----|-----|-----|-----|-----|-----|-----|---|---|---|---|---|---|---|---|---|---|---|---|---|---|---|---|---|---|---|---|---|---|---|---|---|---|---|---|---|---|---|---|---|---|---|---|---|---|---|---|---|---|---|---|---|---|---|---|---|---|---|---|---|---|---|---|---|---|---|---|---|
|                | 150 | 160 | 170 | 180 | 190 | 200 | 210 |   |   |   |   |   |   |   |   |   |   |   |   |   |   |   |   |   |   |   |   |   |   |   |   |   |   |   |   |   |   |   |   |   |   |   |   |   |   |   |   |   |   |   |   |   |   |   |   |   |   |   |   |   |   |   |   |   |   |   |   |   |
| COX1_H_sapiens | A   | S   | V   | D   | L   | T   | I   | F | S | L | H | L | A | G | V | S | S | I | L | G | A | I | N | F | I | T | T | I | N | M | K | P | P | A | M | S | Q | Y | Q | T | P | L | F | V | W | S | V | I | T | A | V | L | L | L | L | S | L | P | V | L | A | A | C | I | T | M | L | L |
| COX1_B_taurus  | A   | S   | V   | D   | L   | T   | I   | F | S | L | H | L | A | G | V | S | S | I | L | G | A | I | N | F | I | T | T | I | N | M | K | P | P | A | M | S | Q | Y | Q | T | P | L | F | V | W | S | V | I | T | A | V | L | L | L | L | S | L | P | V | L | A | A | C | I | T | M | L | L |

  

|                |     |     |     |     |     |     |     |   |   |   |   |   |   |   |   |   |   |   |   |   |   |   |   |   |   |   |   |   |   |   |   |   |   |   |   |   |   |   |   |   |   |   |   |   |   |   |   |   |   |   |   |   |   |   |   |   |   |   |   |   |   |   |   |   |   |
|----------------|-----|-----|-----|-----|-----|-----|-----|---|---|---|---|---|---|---|---|---|---|---|---|---|---|---|---|---|---|---|---|---|---|---|---|---|---|---|---|---|---|---|---|---|---|---|---|---|---|---|---|---|---|---|---|---|---|---|---|---|---|---|---|---|---|---|---|---|---|
|                | 220 | 230 | 240 | 250 | 260 | 270 | 280 |   |   |   |   |   |   |   |   |   |   |   |   |   |   |   |   |   |   |   |   |   |   |   |   |   |   |   |   |   |   |   |   |   |   |   |   |   |   |   |   |   |   |   |   |   |   |   |   |   |   |   |   |   |   |   |   |   |   |
| COX1_H_sapiens | T   | D   | R   | N   | L   | N   | T   | T | F | F | P | A | G | G | D | P | I | L | Y | Q | H | L | F | W | F | F | G | H | P | E | V | Y | I | L | L | P | C | F | C | M | I | S | H | I | V | T | Y | S | G | K | K | E | P | F | G | Y | M | G | M | V | A | M | M | S | I |
| COX1_B_taurus  | T   | D   | R   | N   | L   | N   | T   | T | F | F | P | A | G | G | D | P | I | L | Y | Q | H | L | F | W | F | F | G | H | P | E | V | Y | I | L | L | P | C | F | C | M | I | S | H | I | V | T | Y | S | G | K | K | E | P | F | G | Y | M | G | M | V | A | M | M | S | I |

  

|                |     |     |     |     |     |     |     |   |   |   |   |   |   |   |   |   |   |   |   |   |   |   |   |   |   |   |   |   |   |   |   |   |   |   |   |   |   |   |   |   |   |   |   |   |   |   |   |   |   |   |   |   |   |   |   |   |   |   |   |   |   |   |   |   |   |   |   |   |   |
|----------------|-----|-----|-----|-----|-----|-----|-----|---|---|---|---|---|---|---|---|---|---|---|---|---|---|---|---|---|---|---|---|---|---|---|---|---|---|---|---|---|---|---|---|---|---|---|---|---|---|---|---|---|---|---|---|---|---|---|---|---|---|---|---|---|---|---|---|---|---|---|---|---|---|
|                | 290 | 300 | 310 | 320 | 330 | 340 | 350 |   |   |   |   |   |   |   |   |   |   |   |   |   |   |   |   |   |   |   |   |   |   |   |   |   |   |   |   |   |   |   |   |   |   |   |   |   |   |   |   |   |   |   |   |   |   |   |   |   |   |   |   |   |   |   |   |   |   |   |   |   |   |
| COX1_H_sapiens | C   | P   | L   | G   | F   | I   | V   | W | A | H | H | M | F | T | V | G | M | D | V | D | T | R | A | Y | F | T | S | A | T | M | I | A | I | P | T | G | V | K | V | F | S | W | L | A | T | L | H | G | S | N | M | I | W | S | A | N | V | L | W | A | L | G | F | I | F | L | P | T | V |
| COX1_B_taurus  | C   | P   | L   | G   | F   | I   | V   | W | A | H | H | M | F | T | V | G | M | D | V | D | T | R | A | Y | F | T | S | A | T | M | I | A | I | P | T | G | V | K | V | F | S | W | L | A | T | L | H | G | N | I | W | S | P | A | N | M | W | A | L | G | F | I | F | L | P | T | V |   |   |

  

|                |     |     |     |     |     |     |     |   |   |   |   |   |   |   |   |   |   |   |   |   |   |   |   |   |   |   |   |   |   |   |   |   |   |   |   |   |   |   |   |   |   |   |   |   |   |   |   |   |   |   |   |   |   |   |   |   |   |   |   |   |   |   |   |   |   |   |
|----------------|-----|-----|-----|-----|-----|-----|-----|---|---|---|---|---|---|---|---|---|---|---|---|---|---|---|---|---|---|---|---|---|---|---|---|---|---|---|---|---|---|---|---|---|---|---|---|---|---|---|---|---|---|---|---|---|---|---|---|---|---|---|---|---|---|---|---|---|---|---|
|                | 360 | 370 | 380 | 390 | 400 | 410 | 420 |   |   |   |   |   |   |   |   |   |   |   |   |   |   |   |   |   |   |   |   |   |   |   |   |   |   |   |   |   |   |   |   |   |   |   |   |   |   |   |   |   |   |   |   |   |   |   |   |   |   |   |   |   |   |   |   |   |   |   |
| COX1_H_sapiens | G   | L   | T   | G   | I   | V   | L   | A | N | S | S | L | D | I | V | L | H | D | T | Y | V | V | A | H | P | H | Y | V | L | S | M | G | A | V | F | A | I | M | G | G | F | H | W | F | L | P | S | C | Y | T | L | D | D | T | Y | A | K | I | H | F | A | I | M | F | I | G |
| COX1_B_taurus  | G   | L   | T   | G   | I   | V   | L   | A | N | S | S | L | D | I | V | L | H | D | T | Y | V | V | A | H | P | H | Y | V | L | S | M | G | A | V | F | A | I | M | G | G | F | H | W | F | L | P | S | C | Y | T | L | N | D | T | W | A | K | I | H | F | A | I | M | F | I | G |

  

|                |     |     |     |     |     |     |     |   |   |   |   |   |   |   |   |   |   |   |   |   |   |   |   |   |   |   |   |   |   |   |   |   |   |   |   |   |   |   |   |   |   |   |   |   |   |   |   |   |   |   |   |   |   |   |   |   |   |   |   |   |   |   |   |   |   |   |
|----------------|-----|-----|-----|-----|-----|-----|-----|---|---|---|---|---|---|---|---|---|---|---|---|---|---|---|---|---|---|---|---|---|---|---|---|---|---|---|---|---|---|---|---|---|---|---|---|---|---|---|---|---|---|---|---|---|---|---|---|---|---|---|---|---|---|---|---|---|---|---|
|                | 430 | 440 | 450 | 460 | 470 | 480 | 490 |   |   |   |   |   |   |   |   |   |   |   |   |   |   |   |   |   |   |   |   |   |   |   |   |   |   |   |   |   |   |   |   |   |   |   |   |   |   |   |   |   |   |   |   |   |   |   |   |   |   |   |   |   |   |   |   |   |   |   |
| COX1_H_sapiens | V   | N   | T   | T   | F   | F   | P   | O | H | F | L | G | L | G | M | P | R | R | Y | S | D | Y | P | D | A | T | T | W | N | I | L | S | S | V | G | S | P | I | S | L | T | A | V | L | M | V | F | I | W | E | A | P | A | S | K | R | E | V | L | V | D | L | T | I | T |   |
| COX1_B_taurus  | V   | N   | T   | T   | F   | F   | P   | O | H | F | L | G | L | G | M | P | R | R | Y | S | D | Y | P | D | A | T | T | M | W | N | I | L | S | S | V | G | S | P | I | S | L | T | A | V | L | M | V | F | I | W | E | A | P | A | S | K | R | E | V | L | V | D | L | T | I | T |

  

|                |     |     |   |   |   |   |   |   |   |   |   |   |   |   |   |   |   |   |   |   |   |   |   |
|----------------|-----|-----|---|---|---|---|---|---|---|---|---|---|---|---|---|---|---|---|---|---|---|---|---|
|                | 500 | 510 |   |   |   |   |   |   |   |   |   |   |   |   |   |   |   |   |   |   |   |   |   |
| COX1_H_sapiens | N   | L   | E | W | L | N | G | C | P | P | P | Y | H | T | F | E | E | P | V | M | K | S | . |
| COX1_B_taurus  | N   | L   | E | W | L | N | G | C | P | P | P | Y | H | T | F | E | E | P | V | N | L | K | . |

### b) MT-CO2

|                |   |    |    |    |    |    |    |    |   |   |   |   |   |   |   |   |   |   |   |   |   |   |   |   |   |   |   |   |   |   |   |   |   |   |   |   |   |   |   |   |   |   |   |   |   |   |   |   |   |   |   |   |   |   |   |   |   |   |   |   |   |   |   |   |   |   |   |
|----------------|---|----|----|----|----|----|----|----|---|---|---|---|---|---|---|---|---|---|---|---|---|---|---|---|---|---|---|---|---|---|---|---|---|---|---|---|---|---|---|---|---|---|---|---|---|---|---|---|---|---|---|---|---|---|---|---|---|---|---|---|---|---|---|---|---|---|---|
|                | 1 | 10 | 20 | 30 | 40 | 50 | 60 | 70 |   |   |   |   |   |   |   |   |   |   |   |   |   |   |   |   |   |   |   |   |   |   |   |   |   |   |   |   |   |   |   |   |   |   |   |   |   |   |   |   |   |   |   |   |   |   |   |   |   |   |   |   |   |   |   |   |   |   |   |
| COX2_H_sapiens | M | A  | H  | A  | A  | Q  | V  | G  | L | Q | D | A | T | S | P | I | M | E | R | L | I | T | F | H | D | A | L | M | I | I | F | L | I | C | F | L | V | L | Y | A | L | F | I | T | L | T | K | L | N | T | N | I | S | D | A | Q | E | M | E | T | V | W | T | L | P | A |   |
| COX2_B_taurus  | M | A  | Y  | P  | M  | Q  | L  | G  | F | Q | D | A | T | S | P | I | M | E | R | L | L | H | F | H | D | A | L | M | I | V | F | L | I | S | S | S | L | V | L | Y | I | I | S | L | M | L | T | K | L | H | T | S | T | M | D | A | Q | E | V | E | T | I | W | T | L | P | A |

  

|                |    |    |     |     |     |     |     |   |   |   |   |   |   |   |   |   |   |   |   |   |   |   |   |   |   |   |   |   |   |   |   |   |   |   |   |   |   |   |   |   |   |   |   |   |   |   |   |   |   |   |   |   |   |   |   |   |   |   |   |   |   |   |   |   |   |   |   |   |   |   |
|----------------|----|----|-----|-----|-----|-----|-----|---|---|---|---|---|---|---|---|---|---|---|---|---|---|---|---|---|---|---|---|---|---|---|---|---|---|---|---|---|---|---|---|---|---|---|---|---|---|---|---|---|---|---|---|---|---|---|---|---|---|---|---|---|---|---|---|---|---|---|---|---|---|---|
|                | 80 | 90 | 100 | 110 | 120 | 130 | 140 |   |   |   |   |   |   |   |   |   |   |   |   |   |   |   |   |   |   |   |   |   |   |   |   |   |   |   |   |   |   |   |   |   |   |   |   |   |   |   |   |   |   |   |   |   |   |   |   |   |   |   |   |   |   |   |   |   |   |   |   |   |   |   |
| COX2_H_sapiens | I  | I  | L   | I   | L   | I   | A   | L | P | S | L | R | I | L | Y | M | D | E | V | N | D | P | S | L | I | K | S | I | G | H | O | W | Y | W | T | Y | E | Y | T | D | Y | G | G | L | I | F | N | S | Y | M | I | P | P | L | F | L | E | P | G | D | L | R | L | L | D | V | D | N |   |   |
| COX2_B_taurus  | I  | I  | L   | I   | L   | I   | A   | L | P | S | L | R | I | L | Y | M | D | E | I | N | N | P | S | L | I | V | K | T | M | G | H | O | W | Y | S | Y | E | Y | T | D | Y | E | D | E | D | L | S | F | D | S | Y | M | I | P | T | S | E | L | K | P | G | E | L | R | L | L | E | V | D | N |

  

|                |     |     |     |     |     |     |     |   |   |   |   |   |   |   |   |   |   |   |   |   |   |   |   |   |   |   |   |   |   |   |   |   |   |   |   |   |   |   |   |   |   |   |   |   |   |   |   |   |   |   |   |   |   |   |   |   |   |   |   |   |   |   |   |   |   |   |   |   |   |
|----------------|-----|-----|-----|-----|-----|-----|-----|---|---|---|---|---|---|---|---|---|---|---|---|---|---|---|---|---|---|---|---|---|---|---|---|---|---|---|---|---|---|---|---|---|---|---|---|---|---|---|---|---|---|---|---|---|---|---|---|---|---|---|---|---|---|---|---|---|---|---|---|---|---|
|                | 150 | 160 | 170 | 180 | 190 | 200 | 210 |   |   |   |   |   |   |   |   |   |   |   |   |   |   |   |   |   |   |   |   |   |   |   |   |   |   |   |   |   |   |   |   |   |   |   |   |   |   |   |   |   |   |   |   |   |   |   |   |   |   |   |   |   |   |   |   |   |   |   |   |   |   |
| COX2_H_sapiens | R   | V   | V   | L   | P   | I   | E   | A | P | I | R | M | M | I | T | S | C | D | V | L | H | S | W | A | V | P | S | L | G | L | K | T | D | A | I | P | G | R | L | N | Q | T | T | F | T | A | T | R | P | C | V | Y | Y | G | C | S | E | I | C | G | A | N | H | S | F | M | P | I | V |
| COX2_B_taurus  | R   | V   | V   | L   | P   | M   | E   | M | T | I | R | M | L | V | S | S | E | D | V | L | H | S | W | A | V | P | S | L | G | L | K | T | D | A | I | P | G | R | L | N | Q | T | T | L | M | S | S | R | P | C | V | Y | Y | G | C | S | E | I | C | G | S | N | H | S | F | M | P | I | V |

  

|                |     |   |   |   |   |   |   |   |   |   |   |   |   |   |   |   |   |
|----------------|-----|---|---|---|---|---|---|---|---|---|---|---|---|---|---|---|---|
|                | 220 |   |   |   |   |   |   |   |   |   |   |   |   |   |   |   |   |
| COX2_H_sapiens | L   | E | L | I | P | L | K | I | F | E | M | G | P | V | F | T | L |
| COX2_B_taurus  | L   | E | L | V | P | L | K | Y | F | E | K | W | S | A | S | M | L |

c) MT-CO3

|                |   |    |    |    |    |    |    |    |   |   |   |   |   |   |   |   |   |   |   |   |   |   |   |   |   |   |   |   |   |   |   |   |   |   |   |   |   |   |   |   |   |   |   |   |   |   |   |   |   |   |   |   |   |   |   |   |   |   |   |   |   |   |   |   |   |   |   |
|----------------|---|----|----|----|----|----|----|----|---|---|---|---|---|---|---|---|---|---|---|---|---|---|---|---|---|---|---|---|---|---|---|---|---|---|---|---|---|---|---|---|---|---|---|---|---|---|---|---|---|---|---|---|---|---|---|---|---|---|---|---|---|---|---|---|---|---|---|
|                | 1 | 10 | 20 | 30 | 40 | 50 | 60 | 70 |   |   |   |   |   |   |   |   |   |   |   |   |   |   |   |   |   |   |   |   |   |   |   |   |   |   |   |   |   |   |   |   |   |   |   |   |   |   |   |   |   |   |   |   |   |   |   |   |   |   |   |   |   |   |   |   |   |   |   |
| COX3_H_sapiens | M | T  | H  | Q  | S  | H  | A  | Y  | H | M | V | K | P | S | P | W | P | L | T | G | A | L | S | A | L | L | M | T | S | C | L | A | M | W | F | H | H | S | M | T | L | L | M | E | G | L | T | N | T | L | T | M | Y | Q | W | R | D | V | T | R | E | S | T | Y | Q | G | H |
| COX3_B_taurus  | M | T  | H  | Q  | S  | H  | A  | Y  | H | M | V | N | P | S | P | W | P | L | T | G | A | L | S | A | L | L | M | T | S | C | L | A | M | W | F | H | N | S | M | T | L | L | M | E | G | L | T | N | T | L | T | M | Y | Q | W | R | D | V | I | R | E | S | T | Y | Q | G | H |

  

|                |    |    |     |     |     |     |     |   |   |   |   |   |   |   |   |   |   |   |   |   |   |   |   |   |   |   |   |   |   |   |   |   |   |   |   |   |   |   |   |   |   |   |   |   |   |   |   |   |   |   |   |   |   |   |   |   |   |   |   |   |   |   |   |   |   |   |   |   |
|----------------|----|----|-----|-----|-----|-----|-----|---|---|---|---|---|---|---|---|---|---|---|---|---|---|---|---|---|---|---|---|---|---|---|---|---|---|---|---|---|---|---|---|---|---|---|---|---|---|---|---|---|---|---|---|---|---|---|---|---|---|---|---|---|---|---|---|---|---|---|---|---|
|                | 80 | 90 | 100 | 110 | 120 | 130 | 140 |   |   |   |   |   |   |   |   |   |   |   |   |   |   |   |   |   |   |   |   |   |   |   |   |   |   |   |   |   |   |   |   |   |   |   |   |   |   |   |   |   |   |   |   |   |   |   |   |   |   |   |   |   |   |   |   |   |   |   |   |   |
| COX3_H_sapiens | H  | T  | P   | P   | V   | Q   | K   | L | R | Y | G | M | L | F | I | T | S | E | V | F | F | A | G | F | F | W | A | F | Y | H | S | S | L | A | P | T | P | C | L | G | C | H | W | P | P | T | G | I | T | P | L | N | P | L | E | V | P | L | L | N | T | S | V | L | L | A | S |   |
| COX3_B_taurus  | H  | T  | P   | A   | V   | Q   | K   | L | R | Y | G | M | L | F | I | I | S | E | V | L | F | F | A | G | F | F | W | A | F | Y | H | S | S | L | A | P | T | P | E | L | G | C | H | W | P | P | T | G | I | H | P | L | N | P | L | E | V | P | L | L | N | T | S | V | L | L | A | S |

  

|                |     |     |     |     |     |     |     |   |   |   |   |   |   |   |   |   |   |   |   |   |   |   |   |   |   |   |   |   |   |   |   |   |   |   |   |   |   |   |   |   |   |   |   |   |   |   |   |   |   |   |   |   |   |   |   |   |   |   |   |   |   |   |   |   |   |   |   |   |   |   |
|----------------|-----|-----|-----|-----|-----|-----|-----|---|---|---|---|---|---|---|---|---|---|---|---|---|---|---|---|---|---|---|---|---|---|---|---|---|---|---|---|---|---|---|---|---|---|---|---|---|---|---|---|---|---|---|---|---|---|---|---|---|---|---|---|---|---|---|---|---|---|---|---|---|---|---|
|                | 150 | 160 | 170 | 180 | 190 | 200 | 210 |   |   |   |   |   |   |   |   |   |   |   |   |   |   |   |   |   |   |   |   |   |   |   |   |   |   |   |   |   |   |   |   |   |   |   |   |   |   |   |   |   |   |   |   |   |   |   |   |   |   |   |   |   |   |   |   |   |   |   |   |   |   |   |
| COX3_H_sapiens | G   | V   | S   | I   | T   | W   | A   | H | H | S | L | M | E | N | N | R | N | Q | M | I | Q | A | L | L | I | T | I | L | L | C | L | Y | F | T | L | L | O | A | S | E | Y | F | E | S | P | F | T | I | S | D | G | I | Y | G | S | T | F | F | V | A | T | G | F | H | G | L | E | V | I | I |
| COX3_B_taurus  | G   | V   | S   | I   | T   | W   | A   | H | H | S | L | M | E | G | D | R | K | H | M | L | Q | A | L | L | I | T | I | L | L | C | V | Y | F | T | L | L | O | A | S | E | Y | E | A | P | F | T | I | S | D | G | V | Y | G | S | T | F | F | V | A | T | G | F | H | G | L | E | V | I | I |   |

  

|                |     |     |     |     |     |   |   |   |   |   |   |   |   |   |   |   |   |   |   |   |   |   |   |   |   |   |   |   |   |   |   |   |   |   |   |   |   |   |   |   |   |   |   |   |   |   |   |   |   |   |
|----------------|-----|-----|-----|-----|-----|---|---|---|---|---|---|---|---|---|---|---|---|---|---|---|---|---|---|---|---|---|---|---|---|---|---|---|---|---|---|---|---|---|---|---|---|---|---|---|---|---|---|---|---|---|
|                | 220 | 230 | 240 | 250 | 260 |   |   |   |   |   |   |   |   |   |   |   |   |   |   |   |   |   |   |   |   |   |   |   |   |   |   |   |   |   |   |   |   |   |   |   |   |   |   |   |   |   |   |   |   |   |
| COX3_H_sapiens | G   | S   | T   | F   | L   | I | C | H | I | R | O | L | M | F | H | F | T | S | K | H | E | F | G | F | E | A | A | N | Y | W | H | F | V | D | V | V | W | L | F | L | Y | V | S | I | Y | W | W | G | S |   |
| COX3_B_taurus  | G   | S   | T   | F   | L   | I | V | C | F | R | O | L | K | F | H | F | T | S | N | H | E | F | G | F | E | A | G | A | N | Y | W | H | F | V | D | V | V | W | L | F | L | Y | V | S | I | Y | W | W | G | S |
