# Supplementary material for: Structural Analysis of Mitochondrial Mutations Reveals a Role for Bigenomic Protein Interactions in Human Disease
Source: PubMed Central journal article supplement (PMC3706435; doi:10.1371/journal.pone.0069003), 2013-07-09

**Figure S2. 3D structural analysis flowchart.** The tool allows the classification and functional effects any mtDNA mutation in Complex III and IV genes to be predicted, even if biochemical data from a patient sample is absent.

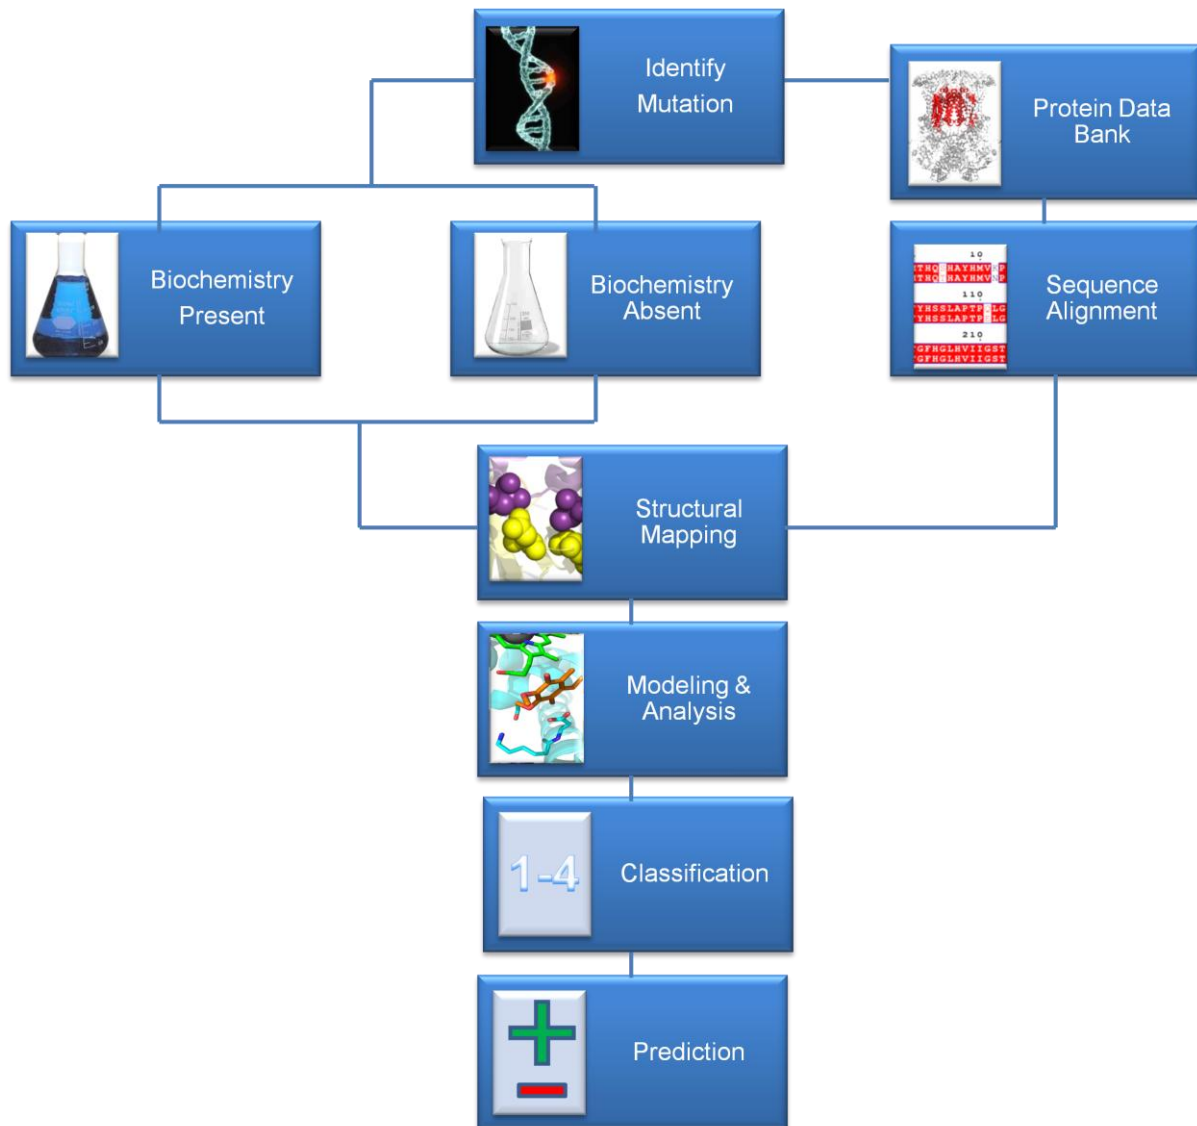

Supplement: pone.0069003.s002.pdf [file pone.0069003.s002.pdf]
